1 **'It's about dying, not just a broken leg' - Qualitative findings on paramedics' perception of end-of-**  
2 **life situations in rescue scenarios in Germany.**

3 (Short title) **Qualitative findings on paramedics' perception of end-of-life situations in rescue**  
4 **scenarios in Germany.**

5 Nicola Rieder<sup>1</sup>, Christian Banse<sup>1</sup>, Franziska Schade<sup>1</sup>, Friedemann Nauck<sup>1</sup>

6 <sup>1</sup>Georg August University Goettingen, University Medical Center, Department of Palliative Medicine,  
7 Germany

8

9

10 Corresponding author:

11 Nicola Rieder M.Sc.

12 Department of Palliative Medicine

13 University Medical Center Goettingen

14 Von-Siebold-Str. 3

15 37075 Goettingen

16 [nicola.rieder@med.uni-goettingen.de](mailto:nicola.rieder@med.uni-goettingen.de)

17

## 18 ABSTRACT

19 In Germany, paramedics and emergency physicians arrive separately on scene ('rendez-vous-system'),  
20 which aims to save resources when no physician is needed. Usually, paramedics arrive firstly on scene,  
21 and are obliged by law to perform all possible action to maintain a patient's life. Especially in end-of-  
22 life (EoL) situations, this can cause conflicts, as those patients may require a decent consideration  
23 between 'saving life' and 'allowing to die'. Whereas the emergency physicians' perspective on this  
24 issue is relatively well examined, until today, in Germany, little is known about the (non-physician)  
25 paramedics' perception.

## 26 Aim

27 To explore paramedics' perception of rescue scenarios involving patients with advanced, incurable,  
28 severe diseases facing their EoL and to scientifically classify this cross-sectional field through experts  
29 from different research fields.

## 30 Method

31 Seven semi-structured narrative interviews with paramedics and one focus group with representatives  
32 from the Center for Medical Law in Goettingen were conducted and analysed using qualitative content  
33 analysis.

## 34 Results

35 Six key categories emerged from the data. Rescue scenarios in EoL situations are perceived as highly  
36 complex situations that are narrowed down through deviating goals of care (1), limited options for  
37 action (2), an emotional overload of all involved actors (3), consequences of a neglected (care) planning  
38 in advance (4) and various background structures, such as current societal and demographic changes  
39 (5) and systemic challenges (6). Complexity also arises from the multiple influences of the different  
40 categories/ their content on one another.

## 41 Discussion

42 Being confronted with patients that do not wish for further life-maintaining treatment marks a  
43 significant shift concerning the range of rescue scenarios, resulting from (i.a.) demographic  
44 developments and structural dynamics in health care. Therefore, in addition to specific actions  
45 restoring paramedics' ability to act in rescue scenarios in EoL situations, a general discussion of the  
46 emergency services' area of responsibility as well as the (emergency) medical treatment and care of  
47 patients with advanced, incurable, severe diseases is required.

48

49 Emergency medical services; End-of-life care; Decision-making; Palliative care; Paramedics; Pre-  
50 hospital care.

51

## 52 **Background**

53 Emergency cares' initial scope is to provide urgent pre-hospital treatment and stabilisation for serious  
54 illnesses and injuries, and transport patients to definitive care. Over time, the number of patients in  
55 prehospital emergency care has been noticeably increasing, resulting not only from an increase in life-  
56 threatening events in total, but also a general increase in the use of emergency care (1,2). Therefore,  
57 emergency care has been in the centre of health policy attentions and discussions around efficiency  
58 and effectiveness for several years (3–7). Nowadays, pre-hospital workflows are characterised by  
59 algorithms to structurally and effectively process different rescue scenarios. These algorithms  
60 standardise the entire operational process through explicit guidelines and instructions, from arriving  
61 on scene until transferring the patient to hospital care (8). Previously, inconsistent standards of care  
62 repeatedly led to scientifically proven deficits in preclinical patient care (9,10). In Germany, prehospital  
63 emergency care implies a “rendez-vous-system” where paramedics and emergency physicians  
64 approach separately on scene (11), aiming to save resources in rescue scenarios where no emergency  
65 physician is needed. In addition, two professional levels of paramedics regulated by the federal law  
66 exist: “Rettungsassistent\*in” (two year education, effective from 1989 until 2013) and  
67 “Notfallsanitäter\*in” (three-year education, effective since in 2014), both are able to provide first level  
68 pre-hospital emergency care. In most instances, paramedics arrive first on scene. One major  
69 disadvantage of the rendez-vous approach may be a delayed arrival or a lack of availability of the  
70 emergency physician personnel when its urgently needed, particularly in situations where  
71 “maintaining life” does not necessarily equals the provision of goal-concordant care.

72 This might be the case, when patients' best possible physical recovery is generally limited:  
73 Expectations, wishes and needs of patients with advanced, incurable, severe diseases increasingly gear  
74 towards maintaining the best possible quality of life rather than maintaining life itself. In those  
75 situations, the indication of invasive or even intensive care treatments seem increasingly questionable  
76 (12,13). This rather “palliative” understanding competes with the principle of emergency care, to  
77 undertake all effective measures and treatments to restore and maintain a patient's vital functions.

78 Research evidence shows that those situations can be extremely distressful for both, physician and  
79 (non-physician) paramedic personnel (14,15). Whereas the emergency physicians' perspective is  
80 relatively well examined (16,17), until today little is known about paramedics' perception of those  
81 situations. Since paramedics in Germany are principally not permitted to modify therapy goals and/or  
82 decide independently on limitation of therapies (as this right is reserved to physicians), they are legally  
83 obliged to perform all possible and indicated action to maintain a patient's life (18). We suspect that  
84 this may lead to complex quandaries, as from paramedics' experience, comfort care might be more  
85 appropriate than aggressive, interventional procedures.

86 Furthermore, a scientific evaluation of this cross-sectional field (e.g. a combination of medical, legal  
87 and ethical perspectives) is missing in Germany.

## 88 **Aim**

89 In this study, we aimed to explore i) how (non-physician) paramedics perceive rescue scenarios  
90 involving patients with advanced, incurable, severe diseases, facing their end of life in Germany, ii)  
91 which support or change is desired and iii) how experts from different research subjects (here:  
92 representatives from the Center for Medical Law in Goettingen) evaluate the situation.

## 93 **Material and Methods**

94 We used qualitative research methods to assess and interpret the matter. To ensure a high scientific  
95 standard and transparency, the reporting of this study will follow the "Consolidated criteria for  
96 reporting qualitative research" (COREQ) Checklist (19).

### 97 *Recruitment*

98 Data were collected between March 2020 and July 2020.

99 We used semi-structured (guided) interviews to explore paramedics' experiences and the meanings  
100 they attribute to them. Additionally, we conducted an online focus group at the Center for Medical

101 Law in Goettingen, whose main task is the scientific research regarding current questions and problems  
102 that have arisen in those areas, where Medicine, Ethics in Medicine and Law collide.

103 Paramedics (n=7) were recruited using existing contacts to study participants of a previous research  
104 project (15) as well as using NRs' personal contacts to intermediaries in the target group such as Heads  
105 of Division in rescue services and/or Chief Fire Officers of Fire and Rescue Services resulting from her  
106 own work experience as a paramedic. Care was taken to select the participants as heterogeneously as  
107 possible regarding their areas of application.

108 Participants were contacted via Email and phone and were informed about the study, its aims and  
109 conduct. Participants should have experienced at one conflictual EoL situation while working in  
110 emergency service and must be willing to talk about it.

111 Furthermore, an online focus group with representatives from the Center for Medical Law in  
112 Goettingen was conducted (20). Five experts from different subjects were asked to discuss the  
113 preliminary results in order to assist in structuring, categorising and interpreting them. NR and FN  
114 actively contacted representatives from the following areas: Criminal Law, Medical Law, Palliative  
115 Medicine, Systematic Theology and Ethics in Medicine. The participants were contacted via Email and  
116 phone and were informed about the study, its' aims and conduct.

117 If participants were interested to participate in the interviews, the study information including data  
118 management procedures was sent via mail. Participants received an informed consent form, and sent  
119 it back via mail.

#### 120 *Data collection*

121 NR prepared an interview guide and discussed the content in the group of the co-authors (FS, CB, FN).  
122 The final guide contained the following questions/ narrative prompts:

123 Please tell me about at least one self-experienced rescue scenario with patients with advanced,  
124 incurable, severe diseases facing their end of life.

125 Which challenges did you meet? Where were the differences to ‘regular’ rescue scenarios?

126 How did you manage those challenges? Please tell me about the strategies and solutions that  
127 worked best for you.

128 What strategies and solutions would you choose again to deal with such situations. Where do  
129 you need more support?

130 Participants (n=7) were encouraged to talk about issues pertinent to the research questions in a one-  
131 to-one interview by NR. The interviews were recorded on a Dictaphone. Due to Covid-19 contact  
132 restrictions, NR conducted the interviews by phone. NR is a public health researcher, with a focus on  
133 the interface between palliative care and emergency medicine. She has worked as a paramedic. She  
134 has experience in conducting interviews and (online) focus groups and works at the Department of  
135 Palliative Medicine at the University Medical Center Goettingen in a research project that focuses on  
136 Advance Care Planning (ACP).

137 For the online focus group, NR adapted the interview guide to the preliminary results. Beforehand, NR  
138 presented them to the participants, to give them the opportunity to discuss the topics.

139 Due to Covid-19 contact restrictions NR conducted the focus group online using Big Blue Button, a  
140 software that is locally hosted by the University Medical Center Gottingen’s computing center, which  
141 ensured conformation with data security regulations. NR was supported by FS. The focus group was  
142 recorded with an inbuilt recorder (video and audio) and, additionally, on a dictaphone (audio only).

143 During the focus group, we used knowledge mapping to create a focus group illustration map (21).  
144 With this method, a researcher records results as a ‘mind map’, which can be discussed with the  
145 participants to validate results, and ensure that participants’ statements were understood. We  
146 discussed the knowledge map with the focus group at the end of the discussion. Two researchers took  
147 part in the focus group. NR moderated the focus groups and FS made notes and prepared the focus  
148 group illustration maps during the focus group. FS is a sociologist and public health researcher, with  
149 experience in conducting focus groups with health care providers in palliative care. She also works as

150 a researcher at the Department of Palliative Medicine at the University Medical Center Goettingen. At  
151 the beginning of the focus group, researchers and participants introduced themselves.

152 Both, interviews and the focus groups statements were transcribed verbatim.

### 153 *Data analysis*

154 Both interviews and the online focus group were analysed using qualitative content analysis (22) to  
155 systemically organise the data into a structured format. To prepare the focus group, interviews were  
156 analysed first. NR inductively coded each interview, and grouped codes to form key categories, using  
157 MAXQDA Analytics Pro 2018. Codes and categories were discussed with FS and CB. Then, these  
158 categories were used to deductively code the focus group. Codes that did not fit into the existing  
159 categories were brought together to form new categories. During the coding, various associations and  
160 dependencies between categories emerged, which are outlined in Figure 1.

### 161 *Ethics*

162 The study received approval from the Research Ethics Committee of the University Medical Center  
163 Goettingen (21/10/19).

## 164 **Results**

### 165 *Sample*

166 Between June 10, 2020, and July 08, 2020, seven interviews were conducted. The interviews lasted  
167 between 59 minutes and 1 hour and 21 minutes. Participants (age range: 27 - 42 years) were working  
168 full- or part-time as a paramedic (“Rettungsassistent\*in” (n=4) or “Notfallsanitäter\*in” (n=3), *Table 1*),  
169 with a total work experience between five and 22 years. Two interviewed paramedics were female and  
170 five were male. Three had an additional qualification as practical instructors. Three participants were  
171 qualified as rescue service organisational commanders. Care was taken to select the participants as  
172 heterogeneously as possible regarding their areas of application, due to differing organisational  
173 structures, e.g. medical treatment standards that are specified by the competent medical



174 management, or the thematic design of further education. Participants were recruited from five  
 175 different rescue stations in four different federal states of Germany.

176 Table 1: Participant characteristics (interviews).

| Characteristics                         | Participants (n=7) |
|-----------------------------------------|--------------------|
| Professional background                 |                    |
| "Rettungsassistent*in"                  | 4                  |
| "Notfallsanitäter*in"                   | 3                  |
| Gender                                  |                    |
| Female                                  | 2                  |
| Male                                    | 5                  |
| Work experience                         |                    |
| 5-10 years                              | 2                  |
| 10-15 years                             | 2                  |
| > 15 years                              | 3                  |
| Additional qualifications               |                    |
| Practical instructor                    | 3                  |
| Rescue service organisational commander | 3                  |
| Federal states                          |                    |
| Bavaria                                 | 1                  |
| Bremen                                  | 2                  |
| Hesse                                   | 2                  |
| North Rhine-Westphalia                  | 2                  |

177  
 178 The focus group lasted 1 hour 54 minutes, including the content-related discussion of the focus group  
 179 illustration map. Participants were representatives from the following areas of research: Criminal Law,

180 Medical Law, Palliative Medicine, Systematic Theology and Ethics in Medicine. All participants (n=5) of  
181 the focus group were male.

182 *Key categories*

183 A total of six key categories emerged from the data. *Fig 1* gives an overview of the categories and  
184 shows their relationships to each other. To support our interpretation of the data, we provide  
185 quotations to illustrate the categories in *Table 2*.

186 *Deviating goals of care:*

187 Emergencies are commonly characterised by a distinct existentiality and the limited availability of  
188 resources such as equipment, time and knowledge about patients' situation or medical history.  
189 Although those aspects generally shape all emergencies, diverging goals of care and the non-  
190 transferable individuality that is contrasting the paramedics' usual guideline-based way of work are  
191 strongly contradicting in rescue scenarios in EoL situations. Additionally, paramedics report the feeling  
192 that enabling dying somehow differs from their common self-perception as rescue personnel.

193 *Limited options for action:*

194 Paramedics describe great uncertainties regarding legal foundations and lawful acting when neglecting  
195 life-sustaining treatment and not only considering death as a possible (negative) outcome but  
196 eventually enabling dying. This contributes to a willingness of the paramedics to pass and delegate  
197 those decisions to superior structures (emergency physicians, hospital etc.), leading to a diffusion of  
198 responsibilities. Furthermore, a lack of education and frameworks when dealing with patients with  
199 advanced, incurable, severe diseases at their EoL, and the wish for intra- and interprofessional content-  
200 related training, further education on advanced, incurable, severe diseases, retrospective case  
201 conferences/ professionally guided medico-ethical reflection and any kind of (legal) framework to  
202 manoeuvre the situation is described. Nonetheless, the introduction of a "palliative algorithm" is  
203 viewed critically, as paramedics doubt that the individuality of one's own death and dying can be  
204 translated in one universal guideline. Another aspect emphasises the general lack of rescue services'

205 access to and networks with geriatric and/or palliative departments that limits options for the initiation  
206 of alternative care.

207 *Emotional overload:*

208 The existentiality of the situation and the lack of preparation and awareness result in an emotional  
209 overload of all involved actors (e.g. paramedics, relatives, caregivers). All paramedics report a distinct  
210 feeling of being overwhelmed, when confronted with situations, where their “normal” (life-  
211 maintaining) approach is neither suitable nor wished for and seems out of place, resulting in feeling  
212 helpless, not being able to take charge of the situation and rather being at its mercy. In addition,  
213 relatives or bystanders tend to pass their emotional overload and existential decisions unfiltered on to  
214 the paramedics, expecting them to tell them what to do and decide. Paramedics perceive this as  
215 strongly demanding and overstraining, strengthening their fear of doing something wrong. According  
216 to the focus groups’ discussion, the latter might be a product of the discordance between rescue  
217 services’ mandate to perform all possible action to rescue and maintain life and the deviating goals of  
218 care in EoL situations, where further life-maintaining treatment is not necessarily prioritised.

219 *Neglected (care) planning in advance:*

220 From paramedics’ perspective, rescue scenarios in EoL situations reveal both, importance and the  
221 absence of preparation in terms of accessible, valid, meaningful, ascertainable and updated advance  
222 directives, and the communication of their content to the authorised representatives or proxies. This  
223 leads to confusion and insecurities amongst paramedics when confronted with those documents,  
224 resulting in an attitude that is described as “rather carry them to hospital and feel safe”. Paramedics  
225 also agree on a lack of awareness regarding both, the actual health status and the debate about the  
226 approaching death as well as its implications by patients, family members, relatives, caregivers etc. as  
227 a possible trigger for conflictual situations. Hence, the dissolving of societal taboos on death and dying  
228 and instead an open debate on it seems necessary to them. Family carers’ knowledge about the  
229 implications of the preference to die at home is limited. Also, the availability of willing and able family

230 or professional carers and the willingness and ability of general practitioners and/or specialised  
231 palliative home care teams to visit and support patients at home is limited. In addition, the general  
232 practitioners' (GPs) role also represent an important aspect to the paramedics. From their perspective,  
233 GPs can/should play a key role in the supply of early, understandable information about the illness  
234 situation and health status, and can/should open the doors to appropriate and necessary care, but are  
235 perceived (by paramedics) as rather reluctant when it comes to breaking bad news and advance care  
236 planning.

237 *Current demographic and societal changes:*

238 Both, interviewees' and the focus group participants', intensively discussed the implications of current  
239 demographic and societal challenges, such as the lack of societal health education and the increase in  
240 chronically ill, multimorbid and/or terminally ill patients in contrast to the health care systems' lack of  
241 structural adaptation. There is consensus that health education and an effective publicly  
242 communication of other appropriate and accessible contact structures and persons in those situations  
243 are needed.

244 *Systemic challenges:*

245 The questionable concordance between emergency services' mandate and deviating goals of care in  
246 EoL situations contribute to the fact that high demands and expectations meet a somehow  
247 "restrained" health system. Inconsistencies and unanswered questions in what paramedics can or  
248 cannot do (in Germany, the Federal States are in charge of the emergency-service-specific legislation),  
249 how to cope with consequential differences in competencies, and how this "catalogue of service" is  
250 communicated to the general public, causes confusion on various levels. Additionally, distinct  
251 hierarchies evolving over the past decades are making the power disparity between physician and non-  
252 physician personnel very clear. According to the focus groups' discussion, systemic complexity, e.g.  
253 knowing when to contact or reach out to which health care provider (general practitioners, on-call  
254 medical services, emergency rescue services, specialised palliative home care) is another factor

255 strengthening complexity. According to the focus groups' discussion a political reflection and  
256 clarifications of the emergency services' function, objectives and responsibilities is strongly advised.

## 257 **Discussion**

258 The confrontation with patients at their EoL, who do not wish for further life-maintaining treatment  
259 marks a perceived shift concerning the range of rescue scenarios. Rescue scenarios in EoL situations  
260 are perceived as highly complex situations that are narrowed down through deviating goals of care,  
261 limited options for action, an emotional overload of all involved actors, consequences of a neglected  
262 (care) planning in advance, and various background structures, such as current societal and  
263 demographic changes and systemic challenges. Complexity also arises from the multiple influences of  
264 the different categories on one another.

265 The increase in terminally ill patients associated with demographic change is amplified by a lack of  
266 early integration into appropriate care structures. This observation is consistent with a recent study  
267 (23), examining hospitalisation rates and causes of nursing home residents. Above all, especially non-  
268 oncological, terminally ill patients (geriatric, dementia, multimorbid and/or chronically ill patients)  
269 often fall through supply networks and are consequently caught repeatedly by emergency care  
270 structures. Access and connection to palliative care (esp. specialised palliative home care) is still  
271 limited, for both patients and rescue service, due to bureaucratic obstacles. Clarification who can be a  
272 reliable, main contact person for those patients, what is required in terms of patient information and  
273 education as well as pro re nata (PRN) medication and how this information can be communicated to  
274 all involved actors, is needed. Hence, bolstering grass-roots health structures at a political and  
275 (healthcare) systemic level, and an effective, more centralised coordination of requests for help that  
276 can directly contact e.g. palliative care providers seems to be indispensable. Those aspects are part of  
277 legislative endeavours to reform the emergency care (9).

278 An open dialogue, educational offerings and the promotion of regional networks are key issues for a  
279 profound literacy in aspects of death and dying. In addition to the assumption that this is the

280 responsibility by GPs, which was discussed by the interviewees, low-threshold information and  
281 education for citizens (e.g. "Letzte Hilfe Kurse") enable them to talk openly about death, dying and  
282 care at the end of life, and contribute to the regional networking of formal and informal support  
283 services (24).

284 Additionally, concepts for a better preparation of the paramedics, such as specifically (geriatric) trained  
285 paramedics or specific geriatric emergency departments that meet the needs of aging, multimorbid  
286 patients, are needed (25,26). Regarding the implementation of specific algorithms, Makowski et al.  
287 published a guideline in 2013 for individual decision-making for palliative patients addressing the  
288 physician emergency personnel, which is based on a categorisation of palliative emergency situations.  
289 It aims to present possible options for action (27). Further research should discuss a possible  
290 transferability to the paramedics' situation.

291 Paramedics reporting their helplessness and feelings of being out of place when being confronted with  
292 patients that do not wish for further life maintaining treatment mark a vital concern for further  
293 research and possible adjustments of emergency care' scope and paramedics' training and education.  
294 The assumption that there are worse things than death and dying may reflect on paramedics' fear to  
295 enhance harm by prolonging suffering instead of help and rescue when being onsite. Therefore, a  
296 reflection on (moral) expectations paramedics (should) have seems important. According to the  
297 literature, those aspects could be met by specific education and training, including guided (self-  
298 )reflection on experienced situations or case studies, terms and principles of medical ethics and law,  
299 paramedics' professional self-image, EoL care, and methods of moderated problem-solving (28).

300 Paramedics report an urgent need and wish for standardised, comprehensible and valid advance  
301 directives, which offer the opportunity for an acceptable and (medical) legal framework for all involved  
302 parties. "Advance Care Planning" (ACP) serves as an example for this: it refers to a comprehensive  
303 consulting and implementation concept in which individual informational and conversational  
304 interventions to empower individuals are combined with the implementation of regionally uniform

305 crisis and emergency forms that is carried out on an institutional and systemic level of all relevant care  
306 structures - including emergency structures (29).

### 307 *Limitations*

308 Due to the Covid-19 contact restrictions and the limited period of the study, we conducted the  
309 interviews via phone and the focus group online as a video conference. Therefore, non-verbal  
310 communication was limited (30). While this potentially restricted the interviewees' and the group's  
311 interaction, we judged this as acceptable as our research interest focused on their experiences. The  
312 non- "face-to-face" -situation allowed us to rapidly recruit participants that were geographically  
313 dispersed and had – especially concerning paramedics' high workload during the beginnings of the  
314 Covid-19 pandemic - limited time resources.

315 The use of qualitative content analysis was and is suitable regarding our research question and our  
316 research focus on explicit knowledge. Nonetheless, limits of this method moving at the surface of a  
317 research problem became apparent: questions about causal conditions e.g. motives for certain  
318 behaviours, or conditions intervening the designated strategies remain unanswered. As described in  
319 the results, categories and sub-categories are interconnected and mutually influence each other.  
320 According to the main category, the issue seems too complex to be represented exclusively with the  
321 possibilities of qualitative content analysis. Our results illustrate, that the identified issues might be  
322 influenced by e.g. aspects of one's own (professional) attitudes and motivation, the individual and  
323 societal perception of death and dying, and the societal understanding of the emergency carers'  
324 service mission. Furthermore, bringing together different perspectives (patients, relatives, other  
325 caregivers) might positively contribute to a comprehensive understanding. In addition, fundamental  
326 debates about the organisation, tasks and responsibilities of emergency services in Germany, and  
327 about the medical, social and ethical perception of aging and dying people are touched. The effect of  
328 new diagnostic options and modern intensive care medicine and its consequences, as well as the  
329 implications of empowering patients' autonomy and a (perceived) lack of health and death literacy,

330 were not considered in detail. Further research that goes methodically in-depth is necessary, especially  
331 because the data cannot be generalised.

### 332 **Conclusion**

333 The aim of our research was a better understanding of the various aspects of conflictual situations  
334 experienced by paramedics in EoL rescue scenarios, to collect and derive knowledge about possible  
335 approaches to solutions and their location on different levels, in different areas and with different  
336 stakeholders. We learned that paramedics in Germany perceive rescue scenarios involving patients  
337 with advanced incurable, severe diseases facing their EoL as highly complex and that they take over an  
338 important role they do not feel well prepared for.

### 339 **Acknowledgement**

340 We would like to thank all study participants for contributing their time and experiences.

### 341 **References**

- 342 1. Seeger C. Interdisziplinäres Arbeiten im Team — Grundlage für die Vernetzung von Palliative  
343 Care. In: Palliative Care [Internet]. Berlin, Heidelberg: Springer Berlin Heidelberg; 2012 [zitiert 7.  
344 März 2012]. S. 171–84. Verfügbar unter: [http://www.springerlink.com/index/10.1007/978-3-540-72325-7\\_11](http://www.springerlink.com/index/10.1007/978-3-540-72325-7_11).  
345
- 346 2. Hobbs FDR, Bankhead C, Mukhtar T, Stevens S, Perera-Salazar R, Holt T, u. a. Clinical workload  
347 in UK primary care: a retrospective analysis of 100 million consultations in England, 2007–14.  
348 The Lancet. 4. Juni 2016;387(10035):2323–30.
- 349 3. Gries A, Bernhard M, Helm M, Brokmann J, Gräsner JT. Zukunft der Notfallmedizin in  
350 Deutschland 2.0. Anaesthesist. Mai 2017;66(5):307–17.



- 351 4. Gretenkort P, Beneker J, Döriges V, Fischer L, Kann D, Sefrin P. Strukturänderungen in der  
352 präklinischen Notfallmedizin - Standortbestimmung 2016. Notarzt. 20. Dezember  
353 2016;32(06):264–70.
- 354 5. Fachexperten der Eckpunktepapier-Konsensus-Gruppe, Fischer M, Kehrberger E, Marung H,  
355 Moecke H, Prückner S, u. a. Eckpunktepapier 2016 zur notfallmedizinischen Versorgung der  
356 Bevölkerung in der Prähospitalphase und in der Klinik. Notfall Rettungsmed. August  
357 2016;19(5):387–95.
- 358 6. Sefrin P. Neuordnung der Notfallversorgung im ambulanten/präklinischen Bereich. NOTARZT.  
359 Juni 2018;34(3):132–9.
- 360 7. Durand AC, Gentile S, Devictor B, Palazzolo S, Vignally P, Gerbeaux P, u. a. ED patients: how  
361 nonurgent are they? Systematic review of the emergency medicine literature. The American  
362 Journal of Emergency Medicine. 1. März 2011;29(3):333–45.
- 363 8. Peters O, Runggaldier K, Schlechtriemen T. Algorithmen im Rettungsdienst: Ein System zur  
364 Effizienzsteigerung im Rettungsdienst. Notfall Rettungsmed. Mai 2007;10(3):229–36.
- 365 9. Messelken M, Dirks B. Zentrale Auswertung von Notarzteinsätzen im Rahmen externer  
366 Qualitätssicherung. Notfall & Rettungsmedizin. 1. Oktober 2001;4(6):408–15.
- 367 10. Schlechtriemen T, Lackner ChrK, Moecke Hp, Stratmann D, Altemeyer KH. Sicherung der  
368 flächendeckenden Notfallversorgung: notwendige Strukturverbesserungen. Notfall &  
369 Rettungsmedizin. 1. Oktober 2003;6(6):419–28.
- 370 11. Sempere-Selva T, Peiró S, Sendra-Pina P, Martínez-Espín C, López-Aguilera I. Inappropriate use  
371 of an accident and emergency department: Magnitude, associated factors, and reasons—An  
372 approach with explicit criteria. Annals of Emergency Medicine. Juni 2001;37(6):568–79.

- 373 12. Alt-Epping B, Geyer A, Nauck F. [Palliative care concepts for patients with non-oncological  
374 diseases]. Dtsch Med Wochenschr. August 2008;133(34–35):1745–9.
- 375 13. Nauck F, Alt-Epping B. Crises in palliative care—a comprehensive approach. The Lancet  
376 Oncologist. 2008;9:1086–91.
- 377 14. Smith AK, Fisher J, Schonberg MA, Pallin DJ, Block SD, Forrow L, u. a. Am I Doing the Right  
378 Thing? Provider Perspectives on Improving Palliative Care in the Emergency Department.  
379 Annals of Emergency Medicine. Juli 2009;54(1):86–93.e1.
- 380 15. Rieder N, Mühe K, Nauck F, Alt-Epping B. „Leben retten bis der Arzt kommt?“: Konflikte und  
381 wahrgenommene Belastung des nichtärztlichen Rettungsdienstpersonals im Umgang mit  
382 Patienten mit fortgeschrittener unheilbarer Erkrankung. Notfall Rettungsmed. Mai  
383 2021;24(3):203–10.
- 384 16. Adams HA, Salomon F. Entscheidungskonflikte am Notfallort. Anesthesiol Intensivmed  
385 Notfallmed Schmerzthe. Mai 2000;35(5):319–25.
- 386 17. Marung H, Wiese C. Palliativmedizin im Notarztdienst. Notf.med up2date. 10. September  
387 2013;8(03):193–204.
- 388 18. Mühe K, Alt-Epping B, Duttge G, Steuer M, Zimmermann A. Die Minuten bis der „Doktor“  
389 kommt: Entscheidungsdilemmata von nichtärztlichem Rettungsfachpersonal. Palliativmedizin.  
390 Januar 2020;21(01):27–33.
- 391 19. Tong A, Sainsbury P, Craig J. Consolidated criteria for reporting qualitative research (COREQ): a  
392 32-item checklist for interviews and focus groups. International Journal for Quality in Health  
393 Care. 16. September 2007;19(6):349–57.

- 394 20. Schade F, Rieder N, Jansky M, Nauck F. Online-Fokusgruppen mit haupt- und ehrenamtlich  
395 Tätigen im Setting der Hospiz- und Palliativversorgung. Zeitschrift für Palliativmedizin.  
396 Manuscript submitted for publication. 2023.
- 397 21. Pelz C, Schmitt A, Meis M. Knowledge Mapping as a Tool for Analyzing Focus Groups and  
398 Presenting Their Results in Market and Evaluation Research. Forum Qualitative Sozialforschung  
399 / Forum: Qualitative Social Research, [Internet]. 2004; Verfügbar unter: [http://www.qualitative-](http://www.qualitative-research.net/index.php/fqs/article/view/601/1303)  
400 [research.net/index.php/fqs/article/view/601/1303](http://www.qualitative-research.net/index.php/fqs/article/view/601/1303).
- 401 22. Mayring Philipp. Qualitative Inhaltsanalyse Grundlagen und Techniken. Weinheim: Beltz; 2010.
- 402 23. Pulst A, Fassmer AM, Hoffmann F, Schmiemann G. Paramedics' Perspectives on the Hospital  
403 Transfers of Nursing Home Residents—A Qualitative Focus Group Study. IJERPH. 26. Mai  
404 2020;17(11):3778.
- 405 24. Bollig G, Brandt F, Ciurlionis M, Knopf B. Last Aid Course. An Education For All Citizens and an  
406 Ingredient of Compassionate Communities. Healthcare. März 2019;7(1):19.
- 407 25. Pinter G, Likar R, Schippinger W, Janig H, Kada O, Cernic K, Herausgeber. Geriatrische  
408 Notfallversorgung [Internet]. Vienna: Springer Vienna; 2013 [zitiert 15. September 2022].  
409 Verfügbar unter: <http://link.springer.com/10.1007/978-3-7091-1581-7>.
- 410 26. Redelsteiner C, Fohringer C, Ganaus P, Rottensteiner S, Hochsteiger R, Weinert S, u. a.  
411 „RettungspflegerIn“ – Erfahrungen einer interdisziplinären Berufsausbildung. In: Neumayr A,  
412 Baubin M, Schinnerl A, Herausgeber. Zukunftswerkstatt Rettungsdienst [Internet]. Berlin,  
413 Heidelberg: Springer Berlin Heidelberg; 2018 [zitiert 15. September 2022]. S. 177–85. Verfügbar  
414 unter: [http://link.springer.com/10.1007/978-3-662-56634-3\\_16](http://link.springer.com/10.1007/978-3-662-56634-3_16).

- 415 27. Makowski C, Marung H, Callies A, Knacke P, Kerner T. Notarzteinsätze bei Palliativpatienten -  
416 Algorithmus zur Entscheidungsfindung und Behandlungsempfehlungen. Anästhesiol  
417 Intensivmed Notfallmed Schmerzther. 15. März 2013;48(02):90–6.
- 418 28. Nauck F. Ethische Aspekte in der Therapie am Lebensende. Med Klin. Oktober  
419 2011;106(2):137–48.
- 420 29. Nauck F, Marckmann G, in der Schmitt J. Behandlung im Voraus planen – Bedeutung für die  
421 Intensiv- und Notfallmedizin. Anästhesiol Intensivmed Notfallmed Schmerzther. Januar  
422 2018;53(01):62–70.
- 423 30. Stewart DW, Shamdasani P. Online Focus Groups. Journal of Advertising. 2. Januar  
424 2017;46(1):48–60.
- 425

426 **Author Contributions**

427 Conceptualisation: Nicola Rieder, Christian Banse, Friedemann Nauck

428 Data curation: Nicola Rieder, Franziska Schade, Christian Banse.

429 Formal analysis: Nicola Rieder, Franziska Schade, Christian Banse.

430 Funding acquisition: Friedemann Nauck

431 Investigation: Nicola Rieder.

432 Methodology: Nicola Rieder, Franziska Schade, Christian Banse.

433 Project administration: Nicola Rieder.

434 Supervision: Friedemann Nauck.

435 Validation: Friedemann Nauck.

436 Writing – original draft: Nicola Rieder.

437 Writing – review & editing: Nicola Rieder, Franziska Schade, Christian Banse, Friedemann Nauck.

438

439 Data Availability Statement: Data cannot be shared publicly because of limited anonymity. Data are

440 available from the Department for Palliative Medicine at the University Medical Center Goettingen

441 (contact via [palliativ.forschung@med.uni-goettingen.de](mailto:palliativ.forschung@med.uni-goettingen.de)) for researchers who meet the criteria for

442 access to confidential data.

443 Funding: The authors received no specific funding for this work.

444 Competing interests: The authors have declared that no competing interests exist.

445

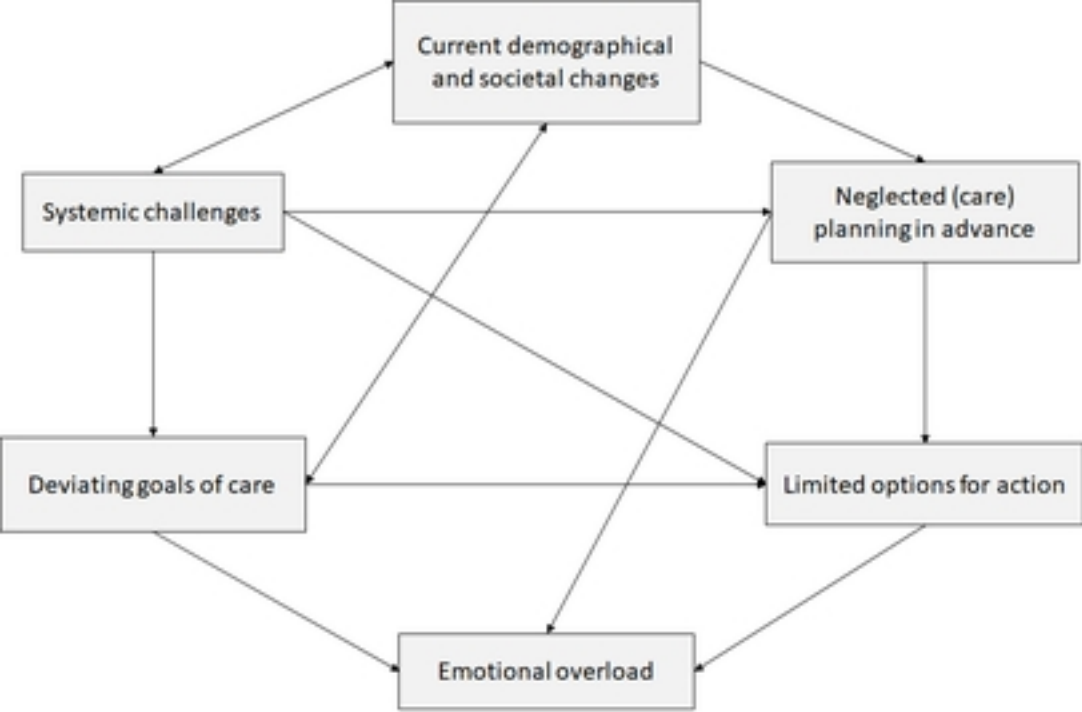

Figure
